# Supplementary figures and images for: Improving the classification of brain tumors in mice with perturbation enhanced (PE)-MRSI
Source: Royal Society of Chemistry journal article supplement (doi:10.1039/c2ib00079b), 2011-12-23

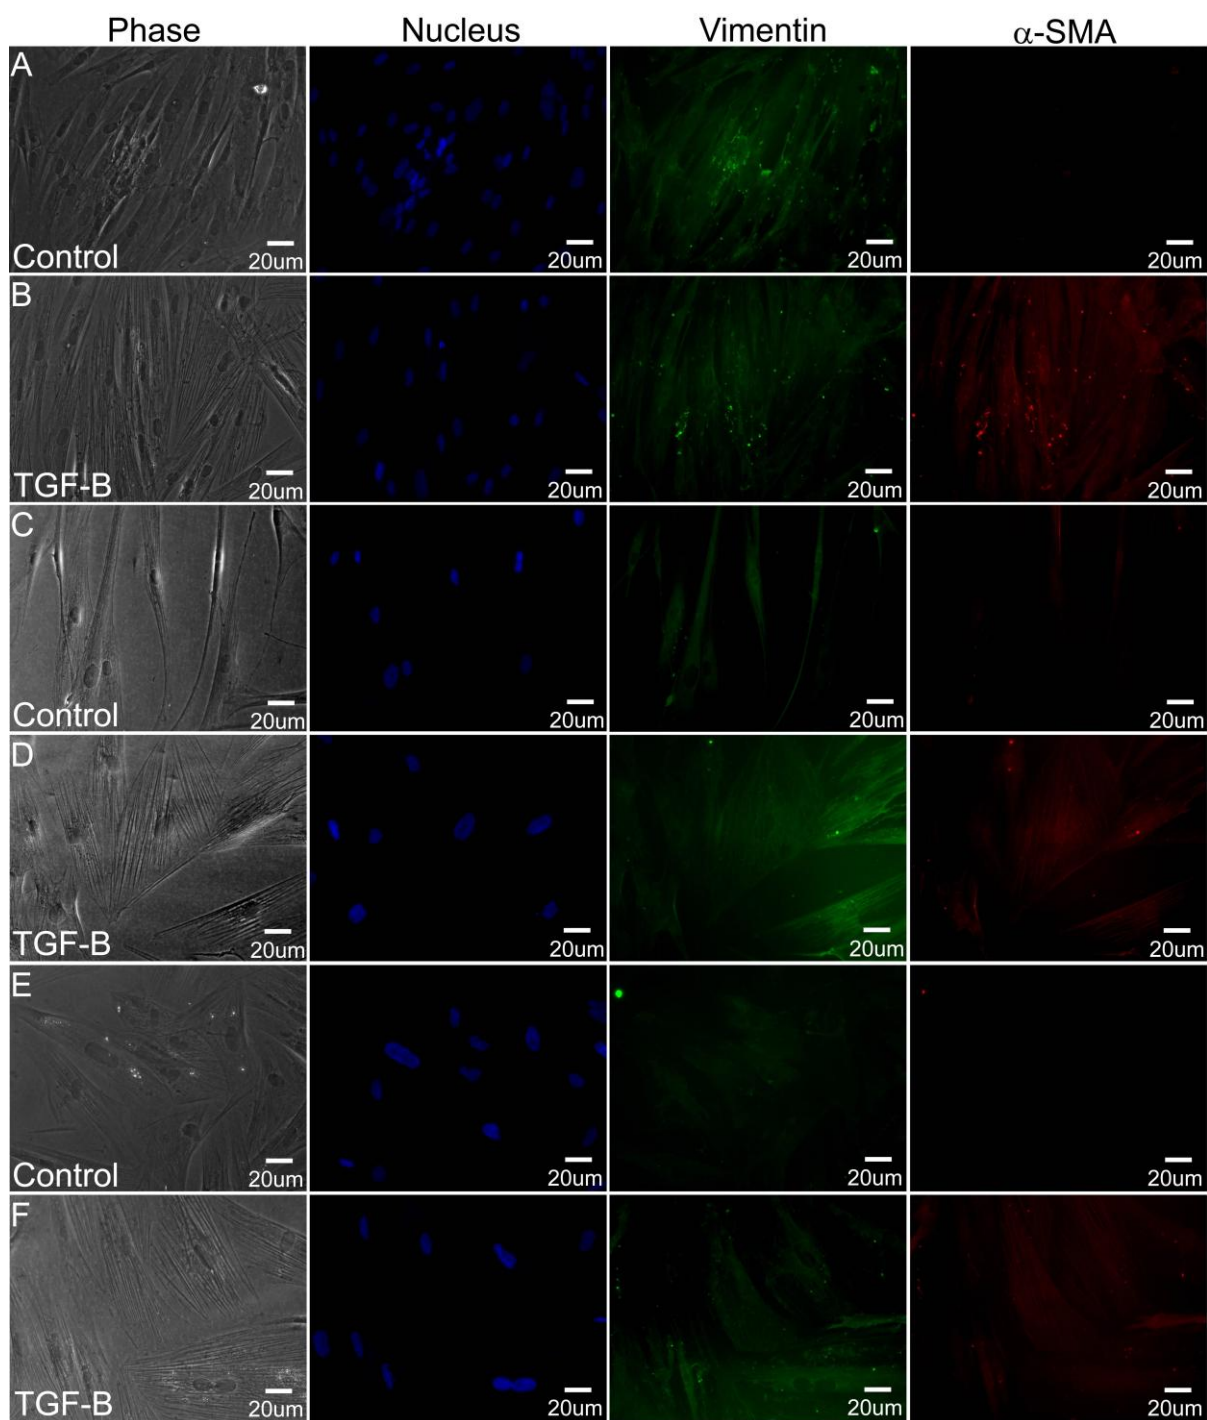

Supplement: c2ib00079b.pdf [file c2ib00079b.pdf]
